# Supplementary material
Source: Springer Nature journal article supplement (https://www.springermedizin.de/resource/supplementary/12914_2011_205_MOESM1_ESM.pdf/9537098)
Supplement: MOESM1 [file 9537098]

Poor leadership and corruption

Strategies for funding orthopaedics

Barriers to access of OMDs

Improving access to ortho care

High costs of OMDs and poverty

Inadequate human resources

Poor healthcare infrastructure

Training more specialists

Policies for prioritizing orthopaedics
